# Supplementary material
Source: MDPI journal article supplement (https://www.mdpi.com/2504-477X/7/8/306)
Supplement: s1 [file s1]

## ***Electronic Supplementary Information***

### **Carbonization of Zr-loaded thiourea-functionalized styrene-divinylbenzene copolymers: an easy way to synthesize nano-ZrO<sub>2</sub>@C and nano-(ZrC, ZrO<sub>2</sub>)@C composites**

Alejandro Martiz<sup>1,2</sup>, Zoltán Károly<sup>1</sup>, Laura Bereczki<sup>1</sup>, László Trif<sup>1</sup>, Attila Farkas<sup>3</sup>, Alfréd Menyhárd<sup>2</sup>, László Kótai<sup>1,4\*</sup>

<sup>1</sup>*Institute of Materials and Environmental Chemistry, Research Centre for Natural Sciences, Hungarian Academy of Sciences, Magyar Tudósok krt. 2., Budapest, H-1117, Hungary*

<sup>2</sup>*Budapest University of Technology and Economics, Department of Physical Chemistry and Materials Science, Műegyetem rakpart 3, Budapest, H-1111, Hungary*

<sup>3</sup>*Budapest University of Technology and Economics, Department of Organic Chemistry and Technology, Műegyetem rakpart 3, H-1111, Budapest, Hungary*

<sup>4</sup>*Deuton-X Ltd., Selmeci u. 89, H-2030, Érd, Hungary*

*ESI Table S1 Chemical analysis of Zr-loaded thiourea functionalized styrene-divinylbenzene copolymer (average of five measurements)*

| Resin           | C [%] | H [%] | N [%] | S [%] | Zr [%] | TU*[%] | Water [%] |
|-----------------|-------|-------|-------|-------|--------|--------|-----------|
| Resinex-CH-80-L | 60.83 | 6.91  | 5.24  | 6.13  | 2.81   | 14.26  | 20.32     |

TU: percentage of thiourea active group m/m in the resin.

ESI Table S2 Raman peak positions (in  $\text{cm}^{-1}$ ) and intensities for  $(\text{ZrO}_2)\text{@C}$  and  $(\text{ZrO}_2, \text{ZrC})\text{@C}$  composite samples

| Sample                 | Raman shifts in $\text{cm}^{-1}$ /intensities |              |              |              |              |              |              | Raman shift intensity ratios |                      |                              |
|------------------------|-----------------------------------------------|--------------|--------------|--------------|--------------|--------------|--------------|------------------------------|----------------------|------------------------------|
|                        | D*<br>(D4)                                    | D<br>(D1)    | D''<br>(D3)  | G            | D'<br>(D2)   | 2D<br>(G1)   | D+D'         | $\frac{I_D}{I_G}$            | $\frac{I_{2D}}{I_G}$ | $\frac{I_{D''}}{I_{G+D+D'}}$ |
| 1000 °C/2h             | 1245<br>0.21                                  | 1349<br>0.94 | 1512<br>0.29 | 1576<br>0.54 | 1608<br>0.59 | 2642<br>0.14 | 2908<br>0.16 | 1.74                         | 0.26                 | 0.14                         |
| 1200 °C/2h             | 1222<br>0.08                                  | 1336<br>1.09 | 1513<br>0.21 | 1570<br>0.57 | 1611<br>0.63 | 2640<br>0.11 | 2901<br>0.11 | 1.91                         | 0.19                 | 0.10                         |
| 1400 °C/2h             | 1175<br>0.05                                  | 1344<br>1.34 | 1527<br>0.22 | 1576<br>0.69 | 1604<br>0.48 | 2654<br>0.16 | 2915<br>0.10 | 1.94                         | 0.23                 | 0.09                         |
| 1400 °C/8h             | 1208<br>0.06                                  | 1336<br>1.62 | 1491<br>0.19 | 1578<br>0.69 | 1611<br>0.54 | 2632<br>0.28 | 2926<br>0.13 | 2.35                         | 0.41                 | 0.07                         |
| 1000 °C/2h-<br>P-Ar-He | 1212<br>0.09                                  | 1348<br>0.72 | 1472<br>0.22 | 1583<br>0.87 | 1617<br>0.18 | 2688<br>0.55 | 2930<br>0.07 | 0.83                         | 0.63                 | 0.12                         |

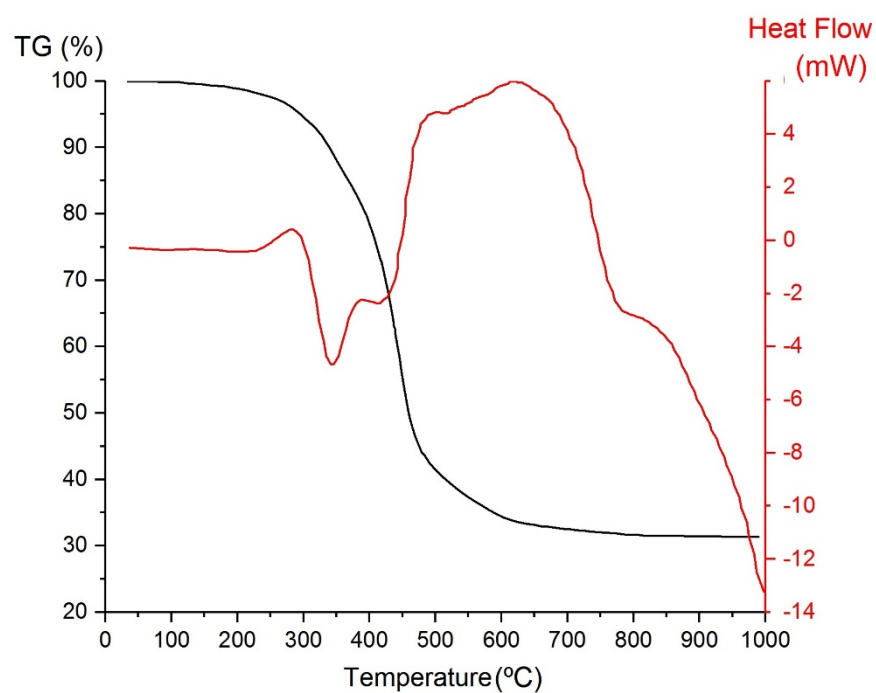

ESI Figure S1 TG-DSC of the of the Zr-loaded thiourea-functionalized styrene-divinylbenzene copolymer under N<sub>2</sub> atmosphere.

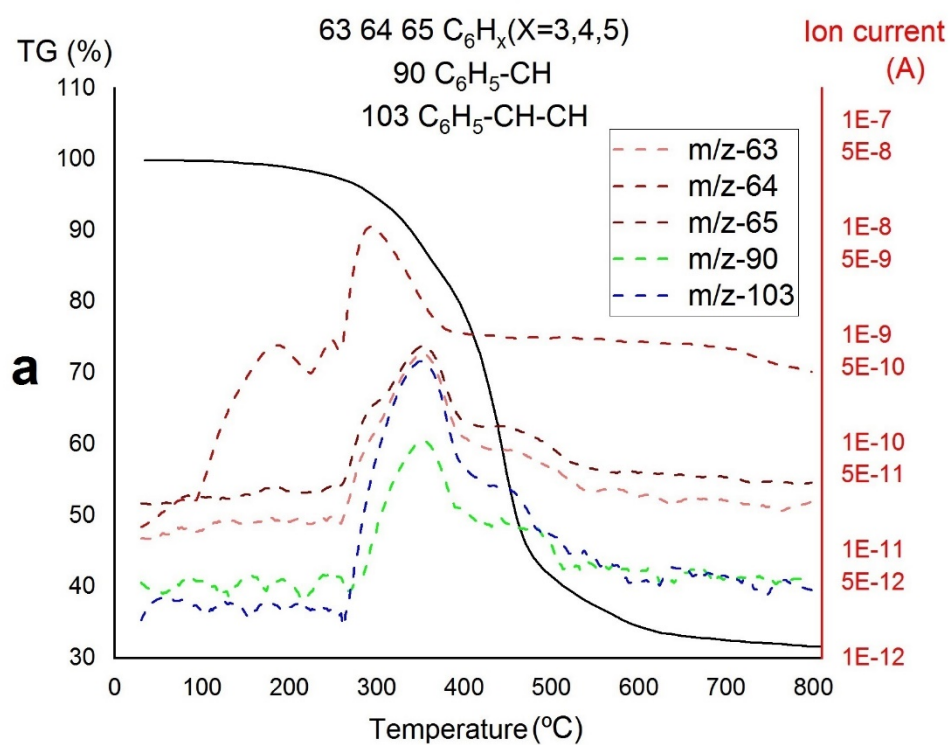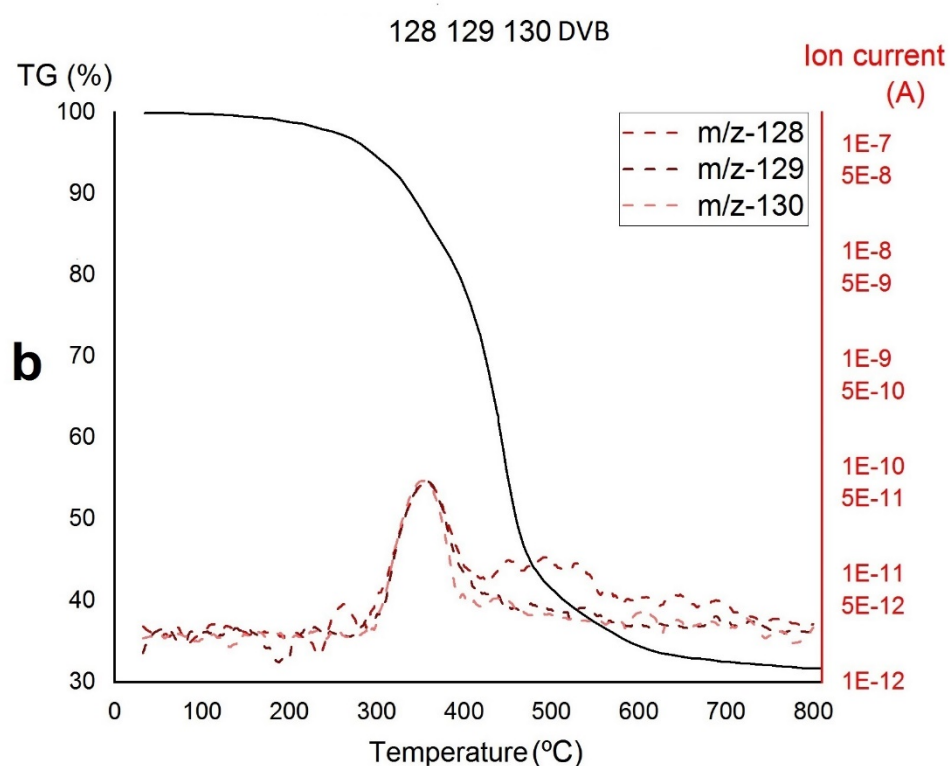

ESI Figure S2. TG-MS of the Zr-loaded thiourea-functionalized styrene-divinylbenzene copolymer:  $Ph-CHCH^+$  ( $m/z=103$ ),  $PhCH^+$  ( $m/z=91$ ),  $C_6H_x^+$  ( $x=3,4,5$ ,  $m/z=63,64,65$ ) (**a**), and DVB fragments ( $m/z=130,129,128$ ) (**b**)

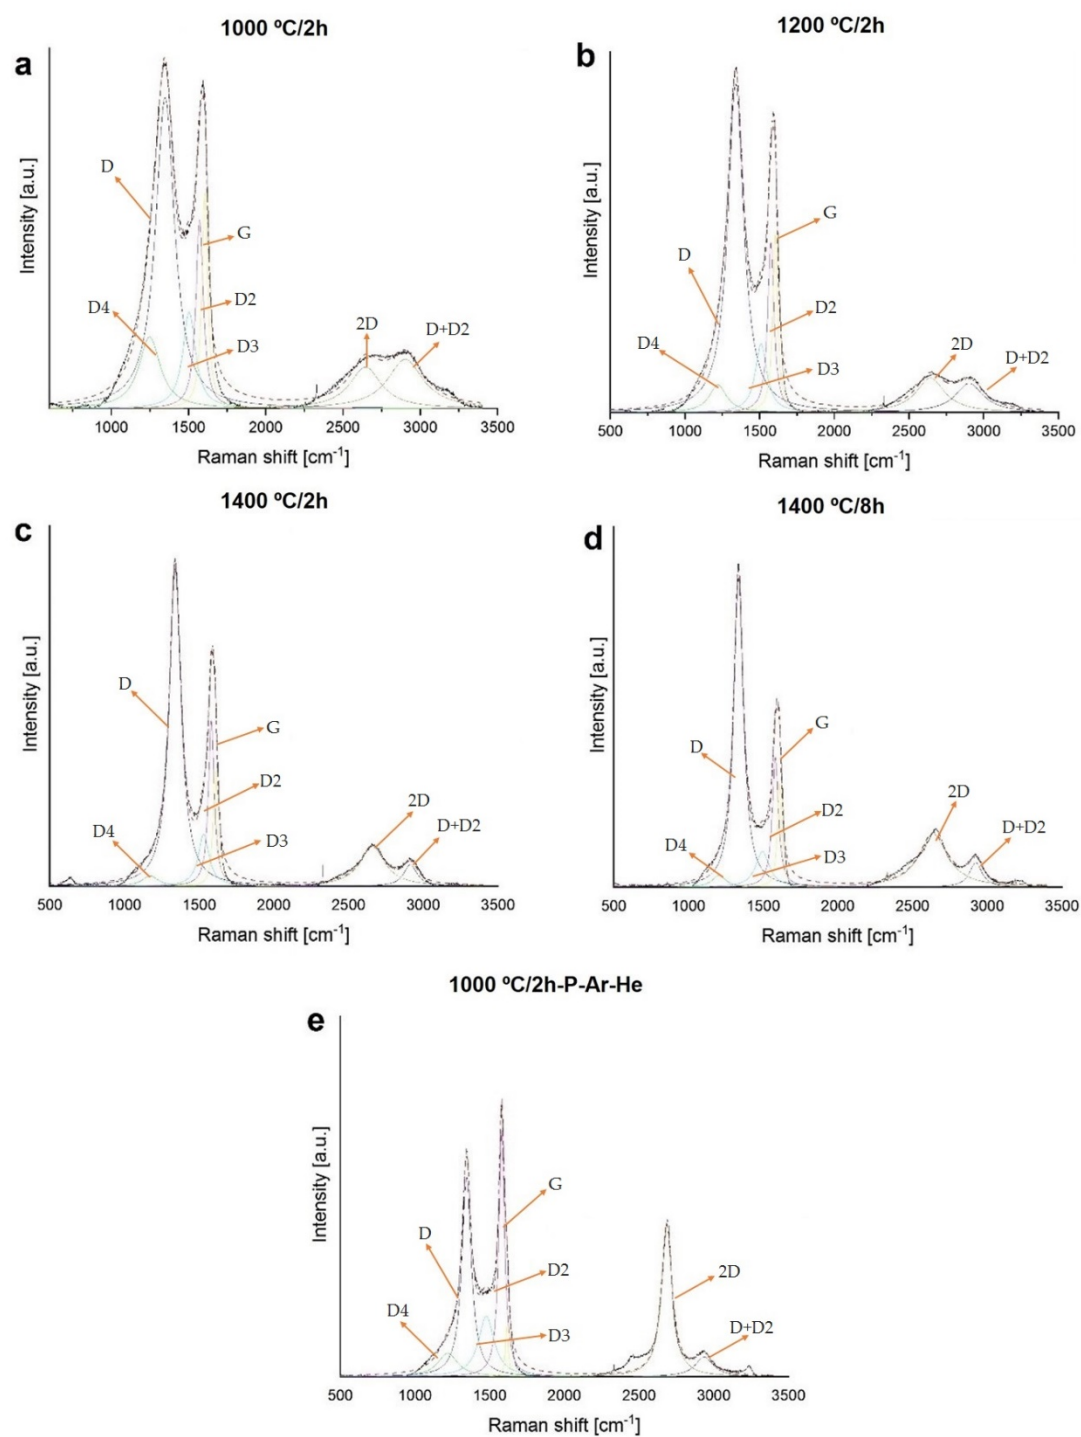

**ESI Figure S3.** Raman spectra of the carbonized Zr-loaded thiourea-functionalized styrene-divinylbenzene copolymer at different temperatures and processes. 1000 °C for 2 hours (a), 1200 °C for 2 hours (b), 1400 °C for 2 hours (c), 1400 °C for 8 hours (d), plasma treated in He atmosphere (e).

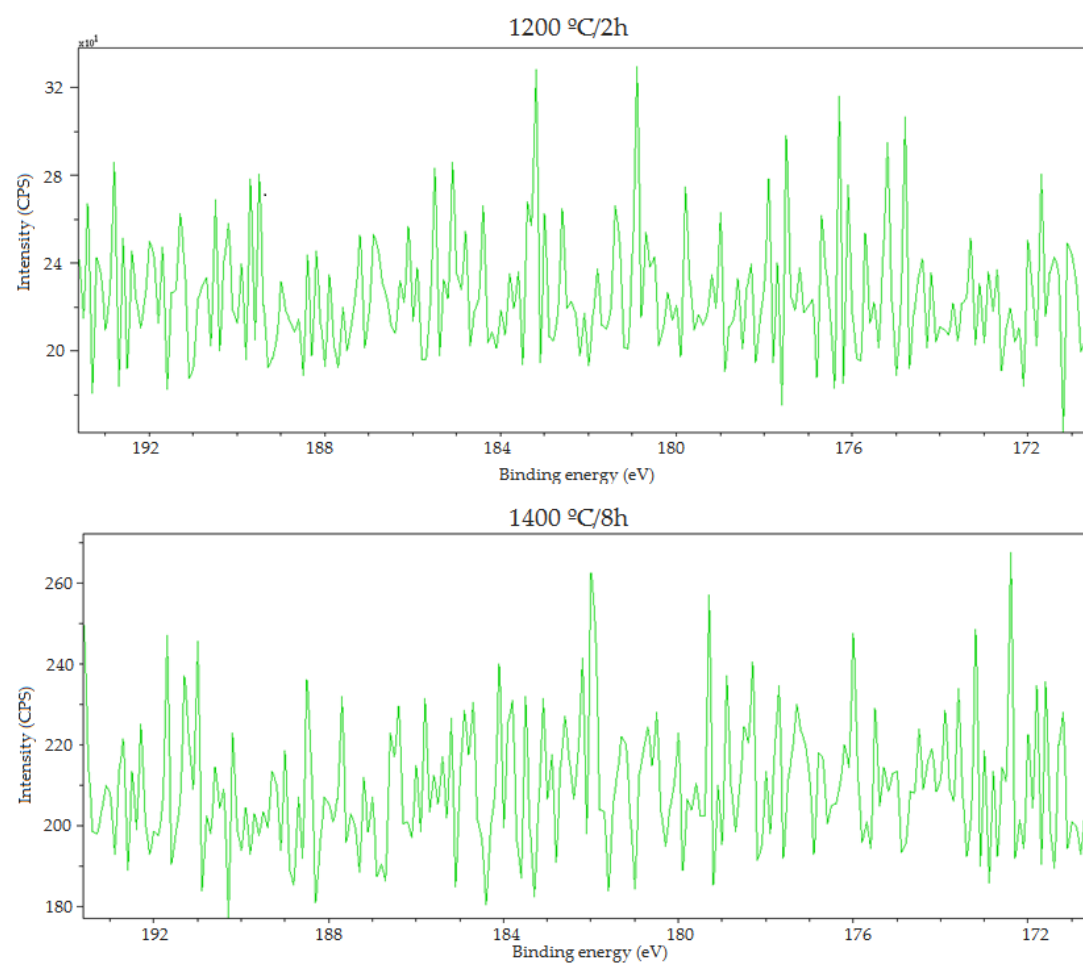

ESI Figure S4. Zr 3d XPS spectra of the samples prepared at 1400 °C for 2 and 8 h heat treatment.

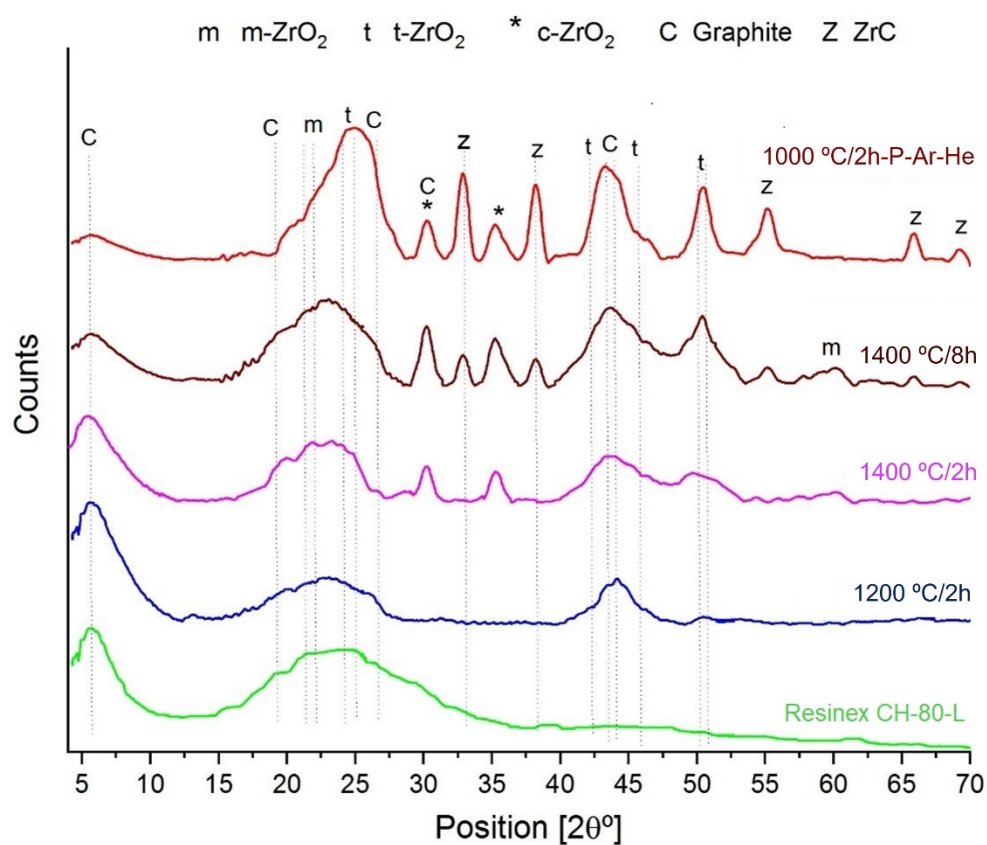

**ESI Figure S5.** XRD pattern of the samples produced by calcination of the Zr-loaded thiourea-functionalized styrene-divinylbenzene copolymer
